# Supplementary material for: Development and validation pathways of artificial intelligence tools evaluated in randomised clinical trials
Source: PubMed Central journal article supplement — BMJ Health Care Inform. 2021 Dec 25;28(1):e100466. doi: 10.1136/bmjhci-2021-100466 (PMC8718483; doi:10.1136/bmjhci-2021-100466), 2021-12-25
Supplement: bmjhci-2021-100466supp001.pdf [file bmjhci-2021-100466supp001.pdf]

## SUPPLEMENTARY MATERIAL

**Supplementary Box:** Search algorithm in Pubmed.

**Supplementary Figure 1:** Study-selection flowchart of AI-RCTs (protocols and published reports).

**Supplementary Table 1:** General characteristics of published protocols and completed RCTs evaluating artificial intelligence tools. Studies are ordered by year of publication and also grouped based on the indexed AI tool.

**Supplementary Table 2:** Information related to data management and assessed outcome(s).

**Supplementary Table 3:** Risk of Bias assessment for each AI-RCT by using the revised Cochrane risk-of-bias tool for randomized trials Risk of Bias (RoB) 2 (Sterne J et al. BMJ. 2019).

**Supplementary Table 4:** Summary of peer-reviewed studies in which the indexed AI tool was developed and externally validated. Studies are ordered according to the time of the corresponding AI-RCT protocol/report publication and grouped by the indexed AI tool.

**Supplementary Box:** Search algorithm in Pubmed and strategies for identification of peer reviewed studies of development and validation of AI tools evaluated in protocols/completed AI-RCTs.

1. (artificial intelligence\*[tiab] OR machine learning[tiab] OR neural network\*[tiab] OR deep learning[tiab] OR cognitive computing[tiab] OR computer vision[tiab] OR natural language processing[tiab])
2. (random\*[tiab] OR protocol\*[tiab] OR study design\*[tiab])
3. 1 and 2
4. Limit 3 to yr = 2000-nowadays

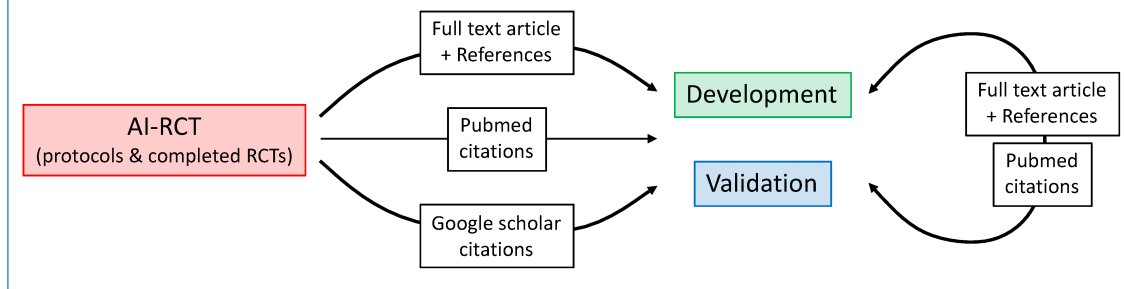

**Supplementary Figure 1:** Study-selection flowchart of AI-RCTs (protocols and published reports).

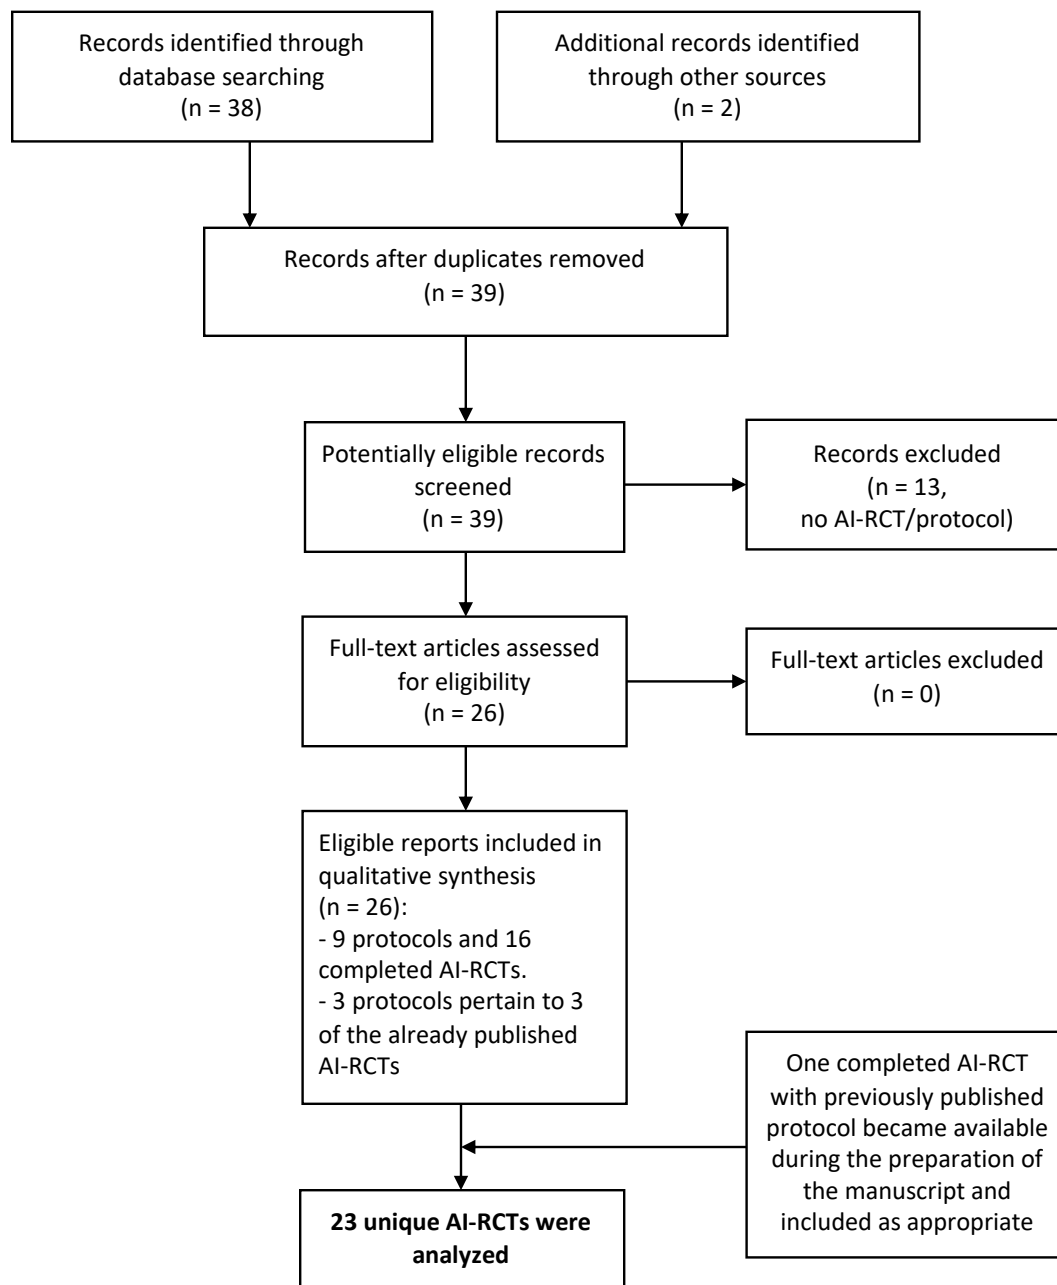

**Supplementary Table 1:** General characteristics of published protocols and completed RCTs evaluating artificial intelligence tools. Studies are ordered by year of publication and also grouped based on the specific AI tool.

| First author, year of publication     | Type of report | Geographic area / Trial's sites / N. arms | Level of randomization | Power calculations                                                           | Sample size | Experimental AI-based intervention                                                                                   | Control intervention                                       | Medical condition                   | Recruitment period             | Funding source | Follow-up duration         | Access to code |
|---------------------------------------|----------------|-------------------------------------------|------------------------|------------------------------------------------------------------------------|-------------|----------------------------------------------------------------------------------------------------------------------|------------------------------------------------------------|-------------------------------------|--------------------------------|----------------|----------------------------|----------------|
| El-Solh A. et al., 2009 <sup>20</sup> | AI-RCT         | North America / Single center / 2         | Patients               | Power 80%, type I error of 5% assuming 20% reduction in time to optimal CPAP | 115         | Artificial neural network-guided continuous positive airway pressure titration                                       | Conventional continuous positive airway pressure titration | Obstructive sleep apnea             | Not reported                   | None reported  | 1 month                    | No             |
| Martin C., et al., 2012 <sup>21</sup> | AI-RCT         | Europe / Multicenter / 2                  | Patients               | Not applicable                                                               | 214         | Patient journey system: machine learning and ruled-based algorithms to analyze answers to questions on health status | Standard of care                                           | Older patients with chronic illness | November 2010 to December 2011 | None reported  | Diverse across individuals | No             |
| Zeevi D., et al. 2015 <sup>22</sup>   | AI-RCT         | Other / Multicenter / 2                   | Patients               | Not applicable                                                               | 100         | Machine-learning algorithm to predict personalized postprandial glycemic response to real-life meals                 | Clinical experts                                           | Healthy and prediabetic individuals | Not reported                   | None reported  | 2 weeks                    | No             |

|                                           |          |                                   |          |                                                                                                         |     |                                                                |                                                                   |                                          |                                |                      |                          |    |
|-------------------------------------------|----------|-----------------------------------|----------|---------------------------------------------------------------------------------------------------------|-----|----------------------------------------------------------------|-------------------------------------------------------------------|------------------------------------------|--------------------------------|----------------------|--------------------------|----|
| Piette J., et al. 2016 <sup>23</sup>      | Protocol | North America / Multicenter / 2   | Patients | Power 90%, type I error (1-sided) of 2.5% to detect noninferiority within a margin of 2 points (SD 4.5) | 320 | Artificial intelligence based cognitive behavioral therapy     | Standard telephone cognitive behavioral therapy                   | Patients with chronic low back pain      | Begin in the fall of 2016      | Non-industry related | 6 months                 | No |
| Sadasivam R., et al. 2016 <sup>24</sup>   | AI-RCT   | North America / Multicenter / 2   | Patients | Not applicable                                                                                          | 120 | Machine learning computer-tailored health communication system | Standard rule-based computer-tailored health communication system | Current smokers                          | October 2014 to January 2015   | Non-industry related | 1 month                  | No |
| Shimabukuro D., et al. 2017 <sup>25</sup> | AI-RCT   | North America / Single center / 2 | Patients | Power 80%, type I error of 5% to detect a reduction of 1.5 days in hospital length of stay              | 142 | Machine learning algorithm for severe sepsis detection         | Standard electronic health record-based severe sepsis detector    | Patients admitted to intensive care unit | December 2016 to February 2017 | Non-industry related | Until hospital discharge | No |

|                                     |          |                                   |          |                                                                                  |      |                                                                                                        |                                                                                                                     |                                                                  |                                 |                      |                                     |    |
|-------------------------------------|----------|-----------------------------------|----------|----------------------------------------------------------------------------------|------|--------------------------------------------------------------------------------------------------------|---------------------------------------------------------------------------------------------------------------------|------------------------------------------------------------------|---------------------------------|----------------------|-------------------------------------|----|
| Fulmer R, et al. 2018 <sup>26</sup> | AI-RCT   | North America / Multicenter / 2   | Patients | Not applicable                                                                   | 75   | Integrative psychological artificial intelligence chatbot tool (Tess)                                  | Information-only control group received an electronic link to the NIMH's eBook on depression among college students | College students at risk of depression and anxiety               | Not reported                    | None reported        | 2 and 4 weeks                       | No |
| Popp C, et al. 2019 <sup>27</sup>   | Protocol | North America / Single center / 2 | Patients | Power 80%, type I error of 5% to detect 2% difference in weight loss             | 200  | Personalized dietary intervention based on estimation of glycemic response to meal by machine learning | Low fat diet                                                                                                        | Overweight adults with pre-diabetes and type 2 diabetes mellitus | January 2018 to December 2019   | Non-industry related | 12 months                           | No |
| Wang P, et al. 2019 <sup>28</sup>   | AI-RCT   | Asia / Single center / 2          | Patients | Power 80%, type I error of 5% to detect 10% difference in adenoma detection rate | 1130 | Colonoscopy with an automatic real-time polyp detection system based on deep learning                  | Standard diagnostic colonoscopy                                                                                     | Patients referred to colonoscopy                                 | September 2017 to February 2018 | None reported        | Real-time automatic polyp detection | No |

|                                   |          |                          |          |                                                                                                               |     |                                                                       |                                               |                                                                    |                             |                      |                |    |
|-----------------------------------|----------|--------------------------|----------|---------------------------------------------------------------------------------------------------------------|-----|-----------------------------------------------------------------------|-----------------------------------------------|--------------------------------------------------------------------|-----------------------------|----------------------|----------------|----|
| Wu L., et al. 2019 <sup>29</sup>  | AI-RCT   | Asia / Single center / 2 | Patients | Power 90%, type I error of 5% to detect 0.1 difference in blind spot rate detection (superiority margin 0.05) | 324 | Artificial intelligence (WISENSE) assisted esophagogastroduodenoscopy | Unassisted esophagogastroduodenoscopy         | Patients undergoing esophagogastroduodenoscopy                     | August 2018 to October 2018 | Non-industry related | None           | No |
| Oka R., et al. 2019 <sup>30</sup> | Protocol | Asia / Multicenter / 2   | Patients | Power 80%, type I error of 5% to detect 0.3% mean change in HbA1c level (non-inferiority margin 0.2%)         | 100 | Artificial intelligence supported nutrition therapy                   | Human nutrition therapy                       | Patients with type 2 diabetes mellitus mainly controlled with diet | April 2018 to April 2020    | Non-industry related | 12 months      | No |
| Lin H., et al. 2019 <sup>31</sup> | AI-RCT   | Asia / Multicenter / 2   | Patients | Power 80%, type I error of 5% to detect 5% difference in diagnostic accuracy                                  | 350 | Artificial intelligence based diagnosis and treatment recommendation  | Ophthalmologist based diagnosis and treatment | Pediatric patients (<14 years) without known cataract              | August 2017 to May 2018     | Non-industry related | Not applicable | No |

|                                    |        |                          |          |                                                                                |      |                                                                                                                                                |                                                                                                                                                   |                                                |                                |                      |                                                                                     |    |
|------------------------------------|--------|--------------------------|----------|--------------------------------------------------------------------------------|------|------------------------------------------------------------------------------------------------------------------------------------------------|---------------------------------------------------------------------------------------------------------------------------------------------------|------------------------------------------------|--------------------------------|----------------------|-------------------------------------------------------------------------------------|----|
| Wang P., et al. 2020 <sup>32</sup> | AI-RCT | Asia / Single center / 2 | Patients | Power 80%, type I error of 5% to detect 10% increase in adenoma detection rate | 1046 | Computer aided colonoscopy using artificial intelligence                                                                                       | Unassisted colonoscopy with sham control system (artificial intelligence model with intentional lower sensitivity and specificity)                | Patients undergoing colonoscopy                | September 2018 to January 2019 | None                 | Real-time                                                                           | No |
| Chen D., et al. 2020 <sup>33</sup> | AI-RCT | Asia / Single center / 3 | Patients | Power 90%, 2-sided alpha of .0167 (type I error 1.67%); based on pilot data    | 437  | Sedated (1) or unsedated (2) esophagogastroduodenoscopy or unsedated ultrathin transoral endoscopy (3) with artificial intelligence assistance | Sedated (1) or unsedated (2) esophagogastroduodenoscopy or unsedated ultrathin transoral endoscopy (3) without artificial intelligence assistance | Patients undergoing esophagogastroduodenoscopy | January 2019 to February 2019  | None reported        | None                                                                                | No |
| Gong D., et al. 2020 <sup>34</sup> | AI-RCT | Asia / Single center / 2 | Patients | Power 80%, type I error of 5% to detect 8% increase in adenoma detection rate  | 704  | Artificial intelligence (deep neural networks and perceptual hash algorithms) enhanced colonoscopy                                             | Unassisted colonoscopy                                                                                                                            | Patients undergoing colonoscopy                | June 2019 to September 2019    | Non-industry related | Diverse across individuals, every 4 weeks until September 6th, 2019; median 18 days | No |



|                                             |                   |                                 |          |                                                                                                                                              |     |                                                                   |                                     |                                                                                                                     |                            |                  |               |    |
|---------------------------------------------|-------------------|---------------------------------|----------|----------------------------------------------------------------------------------------------------------------------------------------------|-----|-------------------------------------------------------------------|-------------------------------------|---------------------------------------------------------------------------------------------------------------------|----------------------------|------------------|---------------|----|
| Wijnberge M., et al. 2020 <sup>35,36</sup>  | Protocol / AI-RCT | Europe / Single center / 2      | Patients | Power 80%, type I error of 5% to detect 75% reduction of hypotension in terms of depth and duration (time-weighted average of 0.38 +/- 0.51) | 68  | Artificial intelligence powered early hypotension detection       | Standard of care                    | Patients undergoing elective non-cardiac surgery under general anesthesia requiring arterial line                   | May 2018 to March 2019     | Industry related | Perioperative | No |
| Schneck E., et al. 2020 <sup>37</sup>       | AI-RCT            | Europe / Single center / 2      | Patients | Not applicable                                                                                                                               | 50  | Artificial intelligence guided hypotension management             | Standard of care                    | Adult patients undergoing total hip arthroplasty                                                                    | July 2017 to August 2018   | Industry related | Perioperative | No |
| Maheshwari K., et al. 2020 <sup>38,39</sup> | Protocol / AI-RCT | North America / Multicenter / 2 | Patients | Power 80%, type I error of 5% to detect 20% reduction of hypotension (AUC-MAP <65mmHg)                                                       | 214 | Artificial intelligence guided hypotension management             | Standard of care                    | Adult patients (>44 years) undergoing elective non-cardiac surgery under general anesthesia requiring arterial line | July 2018 to April 2019    | Industry related | 30 days       | No |
| Auloge P., et al. 2020 <sup>40</sup>        | AI-RCT            | Europe / Single center / 2      | Patients | Power 80%, type I error of 5% to detect 2.0 +/- 1.5mm difference in trocar                                                                   | 20  | Augmented reality/artificial intelligence guided trocar insertion | Fluoroscopy guided trocar insertion | Patients undergoing single-level vertebroplasty                                                                     | January 2018 to April 2018 | None             | Real-time     | No |

|                                       |          |                                 |          |                                                                                                                        |          |                                                                               |                                     |                                                              |                                        |                      |          |    |
|---------------------------------------|----------|---------------------------------|----------|------------------------------------------------------------------------------------------------------------------------|----------|-------------------------------------------------------------------------------|-------------------------------------|--------------------------------------------------------------|----------------------------------------|----------------------|----------|----|
|                                       |          |                                 |          | placement accuracy                                                                                                     |          |                                                                               |                                     |                                                              |                                        |                      |          |    |
| Wong C, et al. 2020 <sup>41</sup>     | Protocol | Asia / Multicenter / 2          | Patients | Sample size will be determined based on the result from the phase I run-in period involving approximately 100 subjects | 200-1000 | Artificial intelligence powered remote physiological monitoring               | Self temperature monitoring         | Asymptomatic subjects with COVID-19 exposure                 | Not reported                           | None reported        | 14 days  | No |
| Aguilera A, et al. 2020 <sup>42</sup> | Protocol | North America / Multicenter / 3 | Patients | Power 80% to detect mean increase of 1250 steps                                                                        | 276      | Adaptive text messages using artificial intelligence (reinforcement learning) | Non-adaptive text messages (random) | Diabetes and depression                                      | Not reported                           | Non-industry related | 6 months | No |
| Hill N, et al. 2020 <sup>43</sup>     | Protocol | Europe / Multicenter / 2        | Patients | Power 88.5%, type I error of 5% to detect 1.7% difference in atrial fibrillation diagnosis rate                        | 18000    | Artificial intelligence guided atrial fibrillation screening                  | Standard of care                    | Adult patients (>30 years) without known atrial fibrillation | First participant enrolled August 2019 | Industry related     | 3 years  | No |

|                                      |                   |                                 |            |                                                                                                    |       |                                                                                         |                  |                                                                                       |                                                          |                      |         |              |
|--------------------------------------|-------------------|---------------------------------|------------|----------------------------------------------------------------------------------------------------|-------|-----------------------------------------------------------------------------------------|------------------|---------------------------------------------------------------------------------------|----------------------------------------------------------|----------------------|---------|--------------|
| Yao X., et al. 2021 <sup>44,45</sup> | Protocol / AI-RCT | North America / Multicenter / 2 | Clinicians | Power 80% to increase low left ventricular ejection fraction detection rate from 2.4 to 3.45-4.06% | 22641 | Artificial intelligence based ECG screening for left ventricular ejection fraction <50% | Standard of care | Patients without known LV-EF reduction (<50%) receiving ECG in a primary care setting | August 2019 to March 2020 (patients' recruitment period) | Non-industry related | 90 days | Upon request |
|--------------------------------------|-------------------|---------------------------------|------------|----------------------------------------------------------------------------------------------------|-------|-----------------------------------------------------------------------------------------|------------------|---------------------------------------------------------------------------------------|----------------------------------------------------------|----------------------|---------|--------------|

**Supplementary Table 2:** Information related to data management and assessed outcome(s).

| First author, year of publication         | Data collection method                          | Strategies dealing with missing data                          | Single or composite primary outcome | Primary outcome                                                         | Type of primary outcome | Outcome adjudication method | Primary outcome favors AI-tool |
|-------------------------------------------|-------------------------------------------------|---------------------------------------------------------------|-------------------------------------|-------------------------------------------------------------------------|-------------------------|-----------------------------|--------------------------------|
| El-Solh A. et al., 2009 <sup>20</sup>     | Not specified                                   | Not specified                                                 | Single                              | Time of achieving optimal continuous positive airway pressure titration | Continuous              | Not specified               | Yes                            |
| Martin C., et al., 2012 <sup>21</sup>     | Not specified                                   | Not specified                                                 | Single                              | Unplanned emergency ambulatory care sensitive admissions                | Binary                  | Not specified               | Yes                            |
| Zeevi D., et al. 2015 <sup>22</sup>       | Not specified                                   | Not specified                                                 | Single                              | Postprandial glycemic responses                                         | Continuous              | Not specified               | Yes                            |
| Piette J., et al. 2016 <sup>23</sup>      | Dedicated personnel & Electronic health records | Multiple imputation methods if >15% of a covariate is missing | Single                              | 24-item Roland Morris Disability Questionnaire (RMDQ)                   | Categorical             | Not specified               | Not applicable                 |
| Sadasivam R., et al. 2016 <sup>24</sup>   | Not specified                                   | Not specified                                                 | Single                              | Smoking cessation                                                       | Binary                  | Not specified               | Yes                            |
| Shimabukuro D., et al. 2017 <sup>25</sup> | Electronic health records                       | Not specified                                                 | Single                              | Average hospital length of stay                                         | Continuous              | Not specified               | Yes                            |
| Fulmer R., et al. 2018 <sup>26</sup>      | Dedicated personnel & Electronic health records | Not specified                                                 | Single                              | Self-report tools (PHQ-9, GAD-7, PANAS) for symptoms                    | Continuous              | Not specified               | Yes                            |

|                                    |                           |                                                                                                                                                            |        |                                               |            |                               |                |
|------------------------------------|---------------------------|------------------------------------------------------------------------------------------------------------------------------------------------------------|--------|-----------------------------------------------|------------|-------------------------------|----------------|
|                                    |                           |                                                                                                                                                            |        | of depression and anxiety                     |            |                               |                |
| Popp C., et al. 2019 <sup>27</sup> | Dedicated personnel       | Identification of predictors for missing data during preliminary analysis phase, subsequently included as covariates under assumption of missing at random | Single | Body weight loss                              | Continuous | Not applicable                | Not applicable |
| Wang P., et al. 2019 <sup>28</sup> | Not specified             | Not specified                                                                                                                                              | Single | Adenoma detection rate                        | Binary     | Not specified                 | Yes            |
| Wu L., et al. 2019 <sup>29</sup>   | Not applicable            | Not specified                                                                                                                                              | Single | Blind spot rate                               | Continuous | Not specified                 | Yes            |
| Oka R., et al. 2019 <sup>30</sup>  | Electronic health records | Use of mixed models                                                                                                                                        | Single | Change in glycosylated hemoglobin levels      | Continuous | Not applicable                | Not applicable |
| Lin H., et al. 2019 <sup>31</sup>  | Not applicable            | Not specified                                                                                                                                              | Single | Diagnostic performance for childhood cataract | Binary     | Diagnosis by cataract experts | No             |
| Wang P., et al. 2020 <sup>32</sup> | Dedicated personnel       | Not specified                                                                                                                                              | Single | Adenoma detection rate                        | Binary     | Not specified                 | Yes            |
| Chen D., et al. 2020 <sup>33</sup> | Not applicable            | Not specified                                                                                                                                              | Single | Blind spot rate                               | Continuous | Not specified                 | Yes            |
| Gong D., et al. 2020 <sup>34</sup> | Not specified             | Not specified                                                                                                                                              | Single | Adenoma detection rate                        | Continuous | Not specified                 | Yes            |

|                                            |                                                 |                                                                                                      |        |                                                                                                    |                    |                |                                                                                                                          |
|--------------------------------------------|-------------------------------------------------|------------------------------------------------------------------------------------------------------|--------|----------------------------------------------------------------------------------------------------|--------------------|----------------|--------------------------------------------------------------------------------------------------------------------------|
| Wijnberge M, et al. 2020 <sup>35,36</sup>  | Dedicated personnel                             | Not specified                                                                                        | Single | Time-weighted average of hypotension during surgery                                                | Continuous         | Not specified  | Yes                                                                                                                      |
| Schneck E, et al. 2020 <sup>37</sup>       | Dedicated personnel                             | Not specified                                                                                        | Single | Frequency and absolute and relative duration of intraoperative hypotension                         | Binary, continuous | Not specified  | Yes                                                                                                                      |
| Maheshwari K, et al. 2020 <sup>38,39</sup> | Dedicated personnel & Electronic health records | Not specified                                                                                        | Single | Time-weighted average of hypotension during surgery                                                | Continuous         | Not specified  | No                                                                                                                       |
| Auloge P, et al. 2020 <sup>40</sup>        | Not applicable                                  | Not specified                                                                                        | Single | Technical feasibility of trocar placement using augmented reality/artificial intelligence guidance | Binary             | Not specified  | Not applicable (no comparison for the primary outcome, primary secondary outcome (used for power calculation) equipoise) |
| Wong C, et al. 2020 <sup>41</sup>          | Dedicated personnel                             | Not specified                                                                                        | Single | Time to diagnosis of coronavirus disease 19                                                        | Continuous         | Not applicable | Not applicable                                                                                                           |
| Aguilera A, et al. 2020 <sup>42</sup>      | Dedicated personnel & Electronic health records | Full-information maximum likelihood, including patients that have at least 1 month of data available | Single | Improvement in physical activity defined by daily step counts                                      | Continuous         | Not applicable | Not applicable                                                                                                           |

|                                      |                           |               |        |                                                          |            |               |                |
|--------------------------------------|---------------------------|---------------|--------|----------------------------------------------------------|------------|---------------|----------------|
| Hill N., et al. 2020 <sup>43</sup>   | Electronic health records | Not specified | Single | Prevalence of diagnosed atrial fibrillation              | Continuous | Not specified | Not applicable |
| Yao X., et al. 2021 <sup>44,45</sup> | Electronic health records | Not specified | Single | Newly discovered left ventricular ejection fraction <50% | Binary     | Not specified | Yes            |

**Supplementary Table 3:** Risk of Bias assessment for each AI-RCT by using the revised Cochrane risk-of-bias tool for randomized trials Risk of Bias (RoB) 2 (Sterne J et al. BMJ. 2019).

| First author, year of publication      | 1. Bias arising from the randomisation process | 2. Bias due to deviations from intended interventions | 3. Bias due to missing outcome data | 4. Bias in measurement of the outcome | 5. Bias in selection of the reported result | Overall                  |
|----------------------------------------|------------------------------------------------|-------------------------------------------------------|-------------------------------------|---------------------------------------|---------------------------------------------|--------------------------|
| El-Sohl A. et al., 2009 [19259717]     | low risk of bias                               | some concerns                                         | low risk of bias                    | low risk of bias                      | some concerns                               | <b>some concerns</b>     |
| Marti C., et al., 2012 [22816797]      | high risk of bias                              | some concerns                                         | high risk of bias                   | high risk of bias                     | some concerns                               | <b>high risk of bias</b> |
| Zeevi D., et al. 2015 [26590418]       | some concerns                                  | high risk of bias                                     | high risk of bias                   | low risk of bias                      | some concerns                               | <b>high risk of bias</b> |
| Sadasivam R., et al. 2016 [27826134]   | low risk of bias                               | some concerns                                         | high risk of bias                   | low risk of bias                      | some concerns                               | <b>high risk of bias</b> |
| Shimabukuro D., et al. 2017 [29435343] | low risk of bias                               | some concerns                                         | low risk of bias                    | low risk of bias                      | some concerns                               | <b>some concerns</b>     |
| Fulmer R., et al. 2018 [30545815]      | low risk of bias                               | high risk of bias                                     | low risk of bias                    | high risk of bias                     | high risk of bias                           | <b>high risk of bias</b> |
| Wang P., et al. 2019 [30814121]        | low risk of bias                               | high risk of bias                                     | low risk of bias                    | high risk of bias                     | some concerns                               | <b>high risk of bias</b> |
| Wu L., et al. 2019 [30858305]          | low risk of bias                               | high risk of bias                                     | low risk of bias                    | high risk of bias                     | low risk of bias                            | <b>high risk of bias</b> |
| Lin H., et al. 2019 [31143882]         | low risk of bias                               | low risk of bias                                      | low risk of bias                    | low risk of bias                      | low risk of bias                            | <b>low risk of bias</b>  |
| Wang P., et al. 2020 [31981517]        | low risk of bias                               | high risk of bias                                     | low risk of bias                    | high risk of bias                     | low risk of bias                            | <b>high risk of bias</b> |
| Chen D., et al. 2020 [31541626]        | low risk of bias                               | some concerns                                         | low risk of bias                    | low risk of bias                      | low risk of bias                            | <b>some concerns</b>     |



|                                                 |                  |                          |                  |                          |                  |                          |
|-------------------------------------------------|------------------|--------------------------|------------------|--------------------------|------------------|--------------------------|
| Gong D., et al. 2020 [31981518]                 | low risk of bias | low risk of bias         | low risk of bias | low risk of bias         | low risk of bias | <b>low risk of bias</b>  |
| Wijnberge M., et al. 2020 [31601239; 32065827]  | low risk of bias | <b>high risk of bias</b> | low risk of bias | low risk of bias         | low risk of bias | <b>high risk of bias</b> |
| Schneck E., et al. 2020 [31784852]              | low risk of bias | some concerns            | low risk of bias | low risk of bias         | low risk of bias | <b>some concerns</b>     |
| Maheshwari K., et al. 2020 [31053082; 32960954] | low risk of bias | some concerns            | low risk of bias | low risk of bias         | low risk of bias | <b>some concerns</b>     |
| Auloge P., et al. 2020 [31270676]               | some concerns    | some concerns            | low risk of bias | <b>high risk of bias</b> | some concerns    | <b>high risk of bias</b> |
| Yao X., et al. 2019 [31710842]                  | low risk of bias | low risk of bias         | low risk of bias | low risk of bias         | low risk of bias | <b>low risk of bias</b>  |

**Supplementary Table 4:** Summary of peer-reviewed studies in which the indexed AI-tool was developed and externally validated. Studies are ordered according to the time of the corresponding AI-RCT protocol/report publication and grouped by the indexed AI tool.

| Protocol/completed AI-RCT                 | Development studies                   |                 |             |                      | External validation studies                 |                 |             |                      |
|-------------------------------------------|---------------------------------------|-----------------|-------------|----------------------|---------------------------------------------|-----------------|-------------|----------------------|
|                                           | First author, year of publication     | Geographic area | Sample size | Recruitment period   | First author, year of publication           | Geographic area | Sample size | Recruitment period   |
| El-Sohl A. et al., 2009 <sup>20</sup>     | El-Sohl A. et al., 2007 <sup>51</sup> | North America   | 311         | Jan 2005 to Aug 2005 | -                                           | -               | -           | -                    |
| Martin C., et al., 2012 <sup>21</sup>     | -                                     | -               | -           | -                    | -                                           | -               | -           | -                    |
| Zeevi D., et al. 2015 <sup>22</sup>       | Zeevi D., et al. 2015 <sup>22</sup>   | Other           | 800         | not reported         | Zeevi D., et al. 2015 <sup>22</sup>         | Other           | 100         | not reported         |
|                                           |                                       |                 |             |                      | Mendes-Soares H., et al. 2019 <sup>52</sup> | North America   | 327         | Oct 2016 to Dec 2017 |
| Piette J., et al. 2016 <sup>23</sup>      | -                                     | -               | -           | -                    | -                                           | -               | -           | -                    |
| Sadasivam R., et al. 2016 <sup>24</sup>   | -                                     | -               | -           | -                    | Faro J., et al. 2020 <sup>53</sup>          | North America   | 55          | Apr 2017 to Nov 2017 |
| Shimabukuro D., et al. 2017 <sup>25</sup> | Calvert J., et al. 2016 <sup>54</sup> | North America   | 1394        | 2001 to 2008         | McCoy A., et al. 2017 <sup>55</sup>         | North America   | 1328        | Feb 2017 to Apr 2017 |
|                                           |                                       |                 |             |                      | Mao Q., et al. 2018 <sup>56</sup>           | North America   | 90353       | Jun 2011 to Mar 2016 |
| Fulmer R., et al. 2018 <sup>26</sup>      | -                                     | -               | -           | -                    | Stephens T., et al. 2019 <sup>57</sup>      | North America   | 23          | not reported         |
|                                           |                                       |                 |             |                      | Green E., et al. 2020 <sup>58</sup>         | Other           | 41          | not reported         |

|                                    |                                     |       |       |                      |                                             |               |      |                      |
|------------------------------------|-------------------------------------|-------|-------|----------------------|---------------------------------------------|---------------|------|----------------------|
| Popp C., et al. 2019 <sup>27</sup> | Zeevi D., et al. 2015 <sup>22</sup> | Other | 800   | not reported         | Zeevi D., et al. 2015 <sup>22</sup>         | Other         | 100  | not reported         |
|                                    |                                     |       |       |                      | Mendes-Soares H., et al. 2019 <sup>S2</sup> | North America | 327  | Oct 2016 to Dec 2017 |
| Wang P., et al. 2019 <sup>28</sup> | Wang P., et al. 2018 <sup>S9</sup>  | Asia  | 1290  | Jan to Feb 2018      | Wang P., et al. 2018 <sup>S9</sup>          | Asia          | 1138 | Jan to Feb 2018      |
|                                    |                                     |       |       |                      | Zhou G., et al. 2020 <sup>S10</sup>         | Asia          | 210  | Jul 2015 to Jan 2019 |
|                                    |                                     |       |       |                      | Wang P., et al. 2020 <sup>S11</sup>         | Asia          | 367  | Jun to Sep 2019      |
|                                    |                                     |       |       |                      | Becq A., et al. 2020 <sup>S12</sup>         | Not reported  | 50   | Not reported         |
| Wu L., et al. 2019 <sup>29</sup>   | Wu L., et al. 2019 <sup>29</sup>    | Asia  | >3000 | Aug 2018 to Oct 2018 | -                                           | -             | -    | -                    |
| Oka R., et al. 2019 <sup>30</sup>  | -                                   | -     | -     | -                    | -                                           | -             | -    | -                    |
| Lin H., et al. 2019 <sup>31</sup>  | Long E., et al. 2017 <sup>S13</sup> | Asia  | 886   | Not reported         | Long E., et al. 2017 <sup>S13</sup>         | Asia          | 57   | Jan 2012 to Mar 2016 |
| Wang P., et al. 2020 <sup>32</sup> | Wang P., et al. 2018 <sup>S9</sup>  | Asia  | 1290  | Jan to Feb 2018      | Wang P., et al. 2018 <sup>S9</sup>          | Asia          | 1138 | Jan to Feb 2018      |
|                                    |                                     |       |       |                      | Zhou G., et al. 2020 <sup>S10</sup>         | Asia          | 210  | Jul 2015 to Jan 2019 |
|                                    |                                     |       |       |                      | Wang P., et al. 2020 <sup>S11</sup>         | Asia          | 367  | Jun to Sep 2019      |
|                                    |                                     |       |       |                      | Becq A., et al. 2020 <sup>S12</sup>         | Not reported  | 50   | Not reported         |
| Chen D., et al. 2020 <sup>33</sup> | Wu L., et al. 2019 <sup>29</sup>    | Asia  | >3000 | Aug 2018 to Oct 2018 | -                                           | -             | -    | -                    |
| Gong D., et al. 2020 <sup>34</sup> | Gong D., et al. 2020 <sup>34</sup>  | Asia  | >5000 | Not reported         | -                                           | -             | -    | -                    |

|                                          |                                       |               |         |                      |                                           |               |        |                      |
|------------------------------------------|---------------------------------------|---------------|---------|----------------------|-------------------------------------------|---------------|--------|----------------------|
| Wijnberge M., et al. 2020 <sup>36</sup>  | Hatib F., et al. 2018 <sup>S14</sup>  | North America | 1334    | 2005 to 2014         | Hatib F., et al. 2018 <sup>S14</sup>      | North America | 204    | Dec 2015 to Jan 2017 |
|                                          |                                       |               |         |                      | Davies S., et al. <sup>S15</sup>          | Europe        | 255    | Nov 2016 to Dec 2017 |
| Maheshwari K., et al. 2020 <sup>39</sup> | Hatib F., et al. 2018 <sup>S14</sup>  | North America | 1334    | 2005 to 2014         | Hatib F., et al. 2018 <sup>S14</sup>      | North America | 204    | Dec 2015 to Jan 2017 |
|                                          |                                       |               |         |                      | Davies S., et al. <sup>S15</sup>          | Europe        | 255    | Nov 2016 to Dec 2017 |
| Schneck E., et al. 2020 <sup>37</sup>    | Hatib F., et al. 2018 <sup>S14</sup>  | North America | 1334    | 2005 to 2014         | Hatib F., et al. 2018 <sup>S14</sup>      | North America | 204    | Dec 2015 to Jan 2017 |
|                                          |                                       |               |         |                      | Davies S., et al. <sup>S15</sup>          | Europe        | 255    | Nov 2016 to Dec 2017 |
| Auloge P., et al. 2020 <sup>40</sup>     | -                                     | -             | -       | -                    | -                                         | -             | -      | -                    |
| Wong C., et al. 2020 <sup>41</sup>       | -                                     | -             | -       | -                    | -                                         | -             | -      | -                    |
| Aguilera A., et al. 2020 <sup>42</sup>   | -                                     | -             | -       | -                    | -                                         | -             | -      | -                    |
| Hill N., et al. 2020 <sup>43</sup>       | Hill N., et al. 2019 <sup>S16</sup>   | Europe        | 2994837 | Jan 2006 to Dec 2016 | Sekelj S., et al. 2020 <sup>S17</sup>     | Europe        | 604135 | Jan 2006 to Dec 2013 |
| Yao X., et al. 2021 <sup>44,45</sup>     | Attia ZI., et al. 2019 <sup>S18</sup> | North America | 44959   | Jan 1994 - Feb 2017  | Attia ZI., et al. 2019 <sup>S19</sup>     | North America | 6008   | Sep 2018             |
|                                          |                                       |               |         |                      | Adedinsewo D., et al. 2020 <sup>S20</sup> | North America | 1606   | May 2018 to Feb 2019 |
|                                          |                                       |               |         |                      | Attia ZI., et al. 2020 <sup>S21</sup>     | North America | 27     | Not reported         |

**Supplementary references reported in Supplementary Table 4:**

- S1.** El-Solh, et al. Predicting effective continuous positive airway pressure in sleep apnea using an artificial neural network. *Sleep Med.* 2007. [PMID: 17512788]
- S2.** Mendes-Soares H., et al. Assessment of a Personalized Approach to Predicting Postprandial Glycemic Responses to Food Among Individuals Without Diabetes. *JAMA Netw. Open.* 2019. [PMID: 30735238]
- S3.** Faro J., et al. Comparison of a Collective Intelligence Tailored Messaging System on Smoking Cessation Between African American and White People Who Smoke: Quasi-Experimental Design. *JMIR Mhealth Uhealth.* 2020. [PMID: 32338619]
- S4.** Calvert JS., et al. A computational approach to early sepsis detection. *Comput Biol Med.* 2016. [PMID: 27208704]
- S5.** McCoy A., et al. Reducing patient mortality, length of stay and readmissions through machine learning-based sepsis prediction in the emergency department, intensive care unit and hospital floor units. *BMJ Open Qual.* 2017. [PMID: 29450295]
- S6.** Mao Q., et al. Multicentre validation of a sepsis prediction algorithm using only vital sign data in the emergency department, general ward and ICU. *BMJ Open.* 2018. [PMID: 29374661]
- S7.** Stephens T., et al. Feasibility of pediatric obesity and prediabetes treatment support through Tess, the AI behavioral coaching chatbot. *Transl Behav Med.* 2019. [PMID: 31094445]
- S8.** Green E., et al. Expanding Access to Perinatal Depression Treatment in Kenya Through Automated Psychological Support: Development and Usability Study. *JMIR Form Res.* 2020. [PMID: 33016883]
- S9.** Wang P., et al. Development and validation of a deep-learning algorithm for the detection of polyps during colonoscopy. *Nat Biomed Eng.* 2018. [PMID: 31015647]
- S10.** Zhou G., et al. Computer aided detection for laterally spreading tumors and sessile serrated adenomas during colonoscopy. *PLoS One.* 2020. [PMID: 32315365]
- S11.** Wang P., et al. Lower Adenoma Miss Rate of Computer-Aided Detection-Assisted Colonoscopy vs Routine White-Light Colonoscopy in a Prospective Tandem Study. *Gastroenterology.* 2020. [PMID: 32562721]
- S12.** Becg A., et al. Effectiveness of a Deep-learning Polyp Detection System in Prospectively Collected Colonoscopy Videos With Variable Bowel Preparation Quality. *J Clin Gastroenterol.* 2020. [PMID: 31789758]
- S13.** Long E., et al. An artificial intelligence platform for the multihospital collaborative management of congenital cataracts. *Nature Biomedical Engineering.* 2017. [doi.org/10.1038/s41551-016-0024]
- S14.** Hatib F., et al. Machine-learning Algorithm to Predict Hypotension Based on High-fidelity Arterial Pressure Waveform Analysis. *Anesthesiology.* 2018. [PMID: 29894315]
- S15.** Davies S., et al. Ability of an Arterial Waveform Analysis-Derived Hypotension Prediction Index to Predict Future Hypotensive Events in Surgical Patients. *Anesth Analg.* 2020. [PMID: 30896602]
- S16.** Hill NR., et al. Predicting atrial fibrillation in primary care using machine learning. *PLoS One.* 2019. [PMID: 31675367]
- S17.** Sekelj S., et al. Detecting undiagnosed atrial fibrillation in UK primary care: Validation of a machine learning prediction algorithm in a retrospective cohort study. *Eur J Prev Cardiol.* 2020. [PMID: 32787456]
- S18.** Attia Z., et al. Screening for cardiac contractile dysfunction using an artificial intelligence-enabled electrocardiogram. *Nat Med.* 2019. [PMID: 30617318]
- S19.** Attia Z., et al. Prospective validation of a deep learning electrocardiogram algorithm for the detection of left ventricular systolic dysfunction. *J Cardiovasc Electrophysiol.* 2019. [PMID: 30821035]
- S20.** Adedinsewo D., et al. Artificial Intelligence-Enabled ECG Algorithm to Identify Patients With Left Ventricular Systolic Dysfunction Presenting to the Emergency Department With Dyspnea. *Circ Arrhythm Electrophysiol.* 2020. [PMID: 32986471]
- S21.** Attia Z., et al. Artificial Intelligence ECG to Detect Left Ventricular Dysfunction in COVID-19: A Case Series. *Mayo Clin Proc.* 2020. [PMID: 33153634]
